# Supplementary material for: Some interesting insights into the acetone sensing characteristics of monoclinic WO3
Source: Royal Society of Chemistry journal article supplement (doi:10.1039/d2ma00651k), 2023-01-01
Supplement: d2ma00651k1.pdf [file d2ma00651k1.pdf]

## Supporting Information

### Some Interesting insights into the Acetone Sensing Characteristics of Monoclinic WO<sub>3</sub>

Puja Ghosh<sup>a</sup>, Manikandan M,<sup>b, c</sup> Shrabanee Sen<sup>a\*</sup> and Parukuttyamma Sujatha Devi<sup>a,b,c\*</sup>

<sup>a</sup>Functional Materials and Devices Division, CSIR-Central Glass and Ceramic Research Institute, Jadavpur, Kolkata 700032, India

<sup>b</sup>Chemical Sciences and Technology Division, CSIR-National Institute of Interdisciplinary Science and Technology, Thiruvananthapuram 695019, India

<sup>c</sup>Academy of Scientific and Innovative Research (AcSIR), Ghaziabad 201002, India.

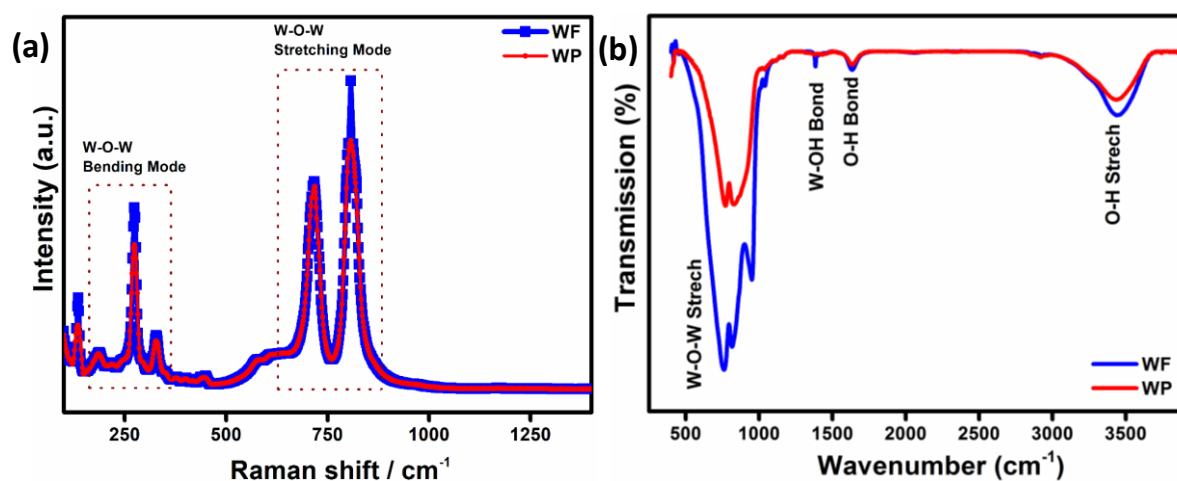

**Fig. S1** (a) Raman spectra and (b) FTIR spectra of WP and WF samples, respectively.

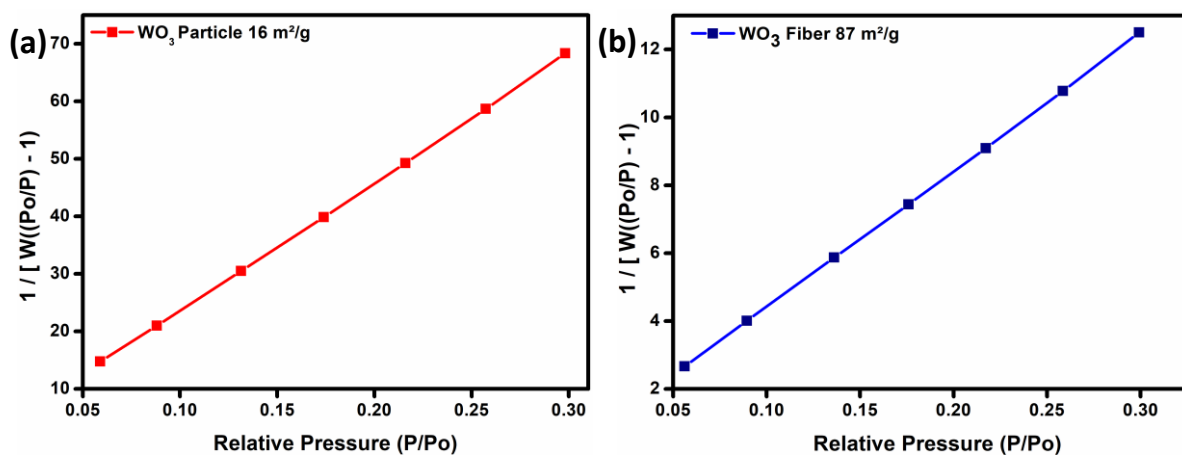

**Fig. S2** BET surface area plots of (a) WP and (b) WF, respectively.

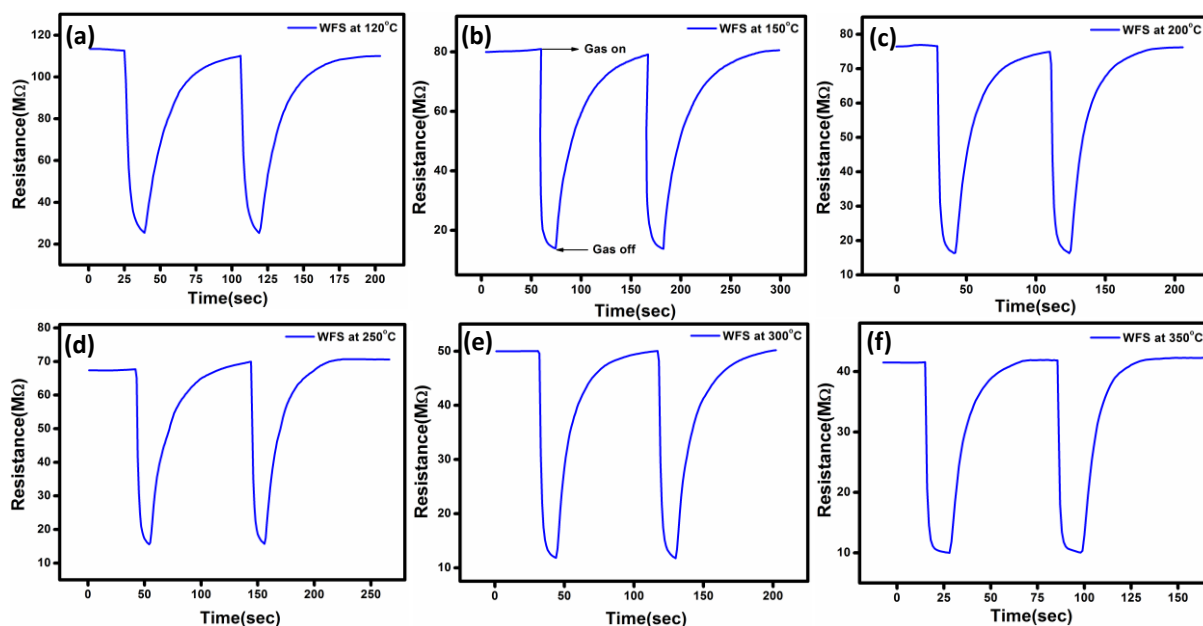

**Fig. S3** Response-recover dynamic curve of WFS at different operating temperatures.

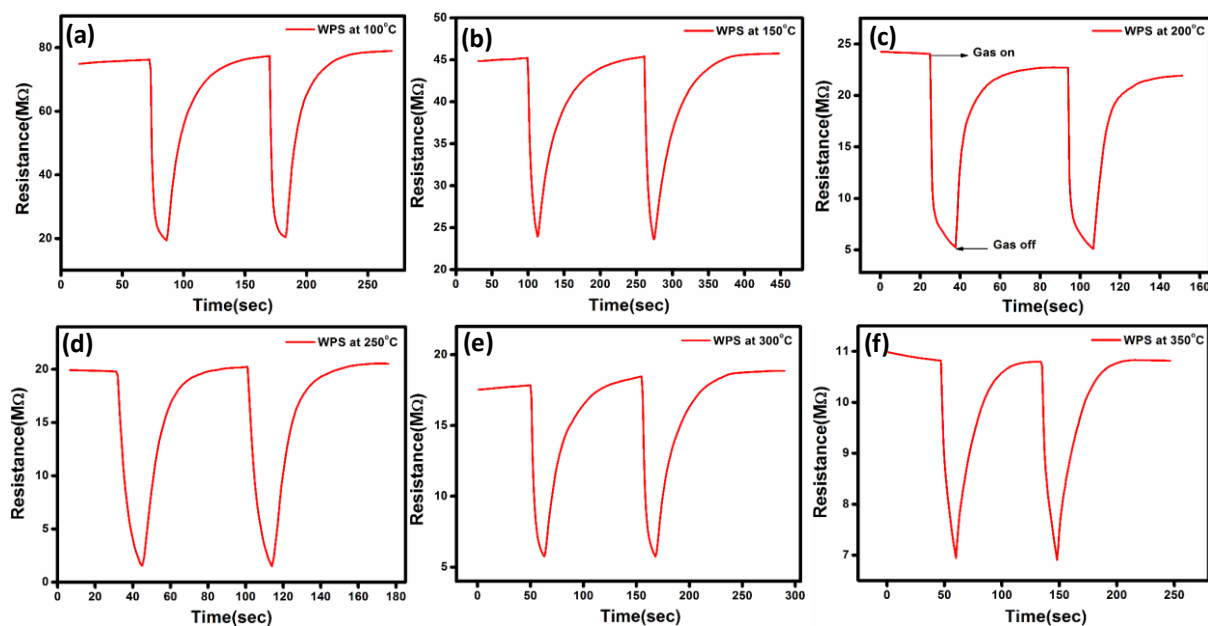

**Fig. S4** Response-recover dynamic curve of WPS at different operating temperatures.

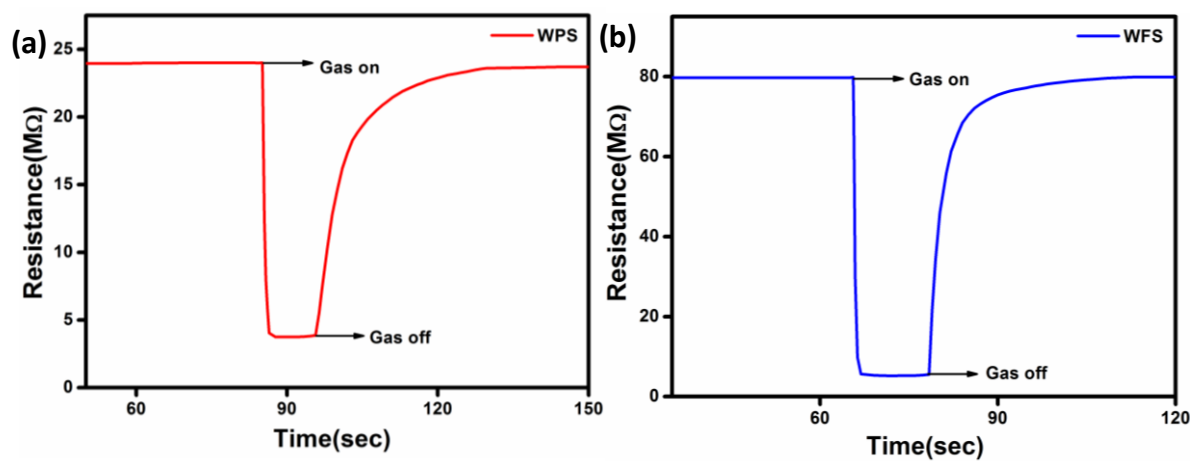

**Fig. S5** Steady State dynamic curve of (a) WPS and (b) WFS.

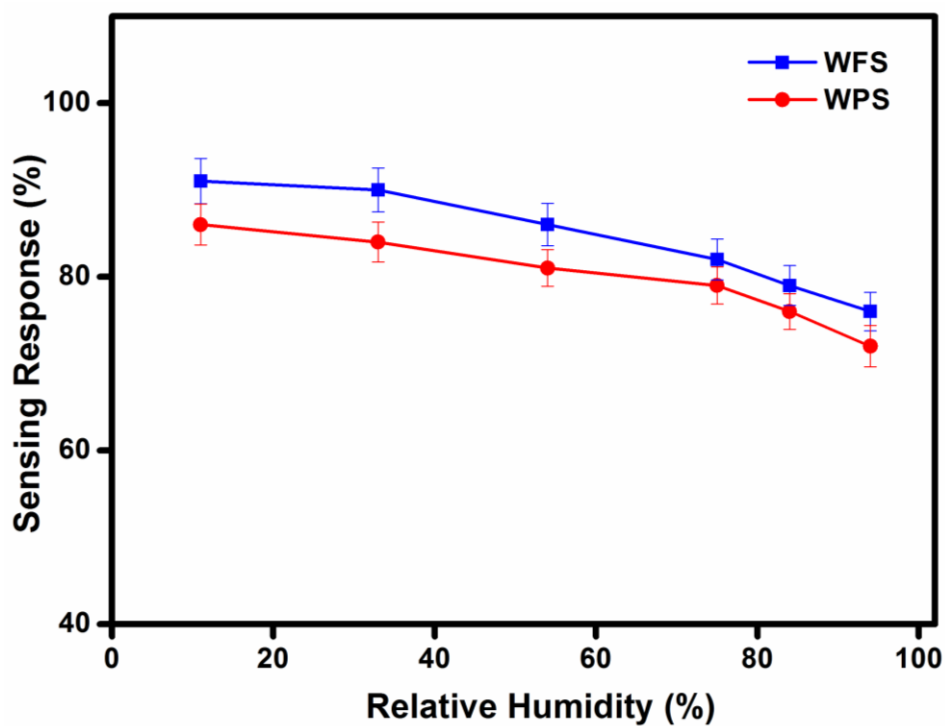

**Fig. S6** Sensitivity Response variation with Relative Humidity (%) at 10ppm acetone.

**Table S1.** Saturated aqueous solutions for different salts and their corresponding % RH.

| Sl. No. | Salts              | % RH |
|---------|--------------------|------|
| 1       | Lithium chloride   | 11   |
| 2       | Magnesium chloride | 33   |
| 3       | Sodium dichromate  | 54   |
| 4       | Sodium chloride    | 75   |
| 5       | Potassium chloride | 84   |
| 6       | Potassium nitrate  | 94   |

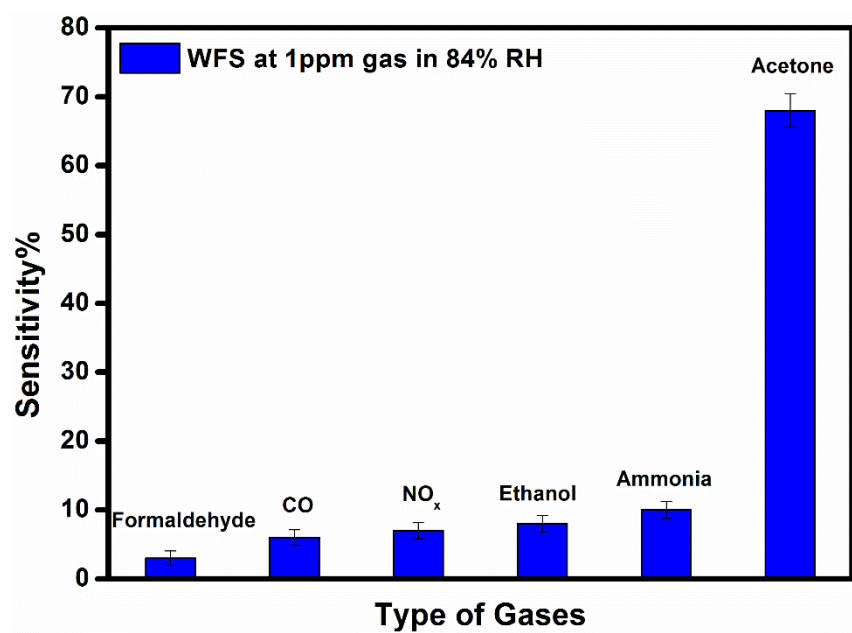

**Fig.S7 :** Sensitivity response bar graph of WFS sensor towards 1ppm of concentration of different interfering gases at 84% RH.
